# Supplementary material for: BMI, RQ, Diabetes, and Sex Affect the Relationships Between Amino Acids and Clamp Measures of Insulin Action in Humans
Source: PubMed Central journal article supplement — Diabetes. 2014 Jan 16;63(2):791–800. doi: 10.2337/db13-0396 (PMC3900549; doi:10.2337/db13-0396), 2014-01-16
Supplement: supp_db13-0396_DB130396SupplementaryData.pdf [file supp_db13-0396_DB130396SupplementaryData.pdf]

SUPPLEMENTARY DATA

**Supplementary Table 1.** Descriptive characteristics of study subjects by BMI subgroup.

|                                      | *non-T2DM      |         |                |                |       |          |
|--------------------------------------|----------------|---------|----------------|----------------|-------|----------|
| Descriptive Statistics               | BMI<30         |         | BMI≥30         | T2DM           |       |          |
| N                                    | 43             |         | 50             | 31             |       |          |
| Race (%)                             | 56% EA, 42% AA |         | 36% EA, 64% AA | 64% EA, 36% AA |       |          |
| Gender (% Male)                      | 47%            |         | 30%            | 48%            |       |          |
| Diabetic Status                      | 2 IFG/ 5 IGT   |         | 1 IFG/ 10 IGT  | 32 TD2M        |       |          |
| Age (years)                          | 41             | ± 10    | 41             | ± 10           | 45    | ± 9      |
| Glucose disposal rate (mg/kgLBM/min) | 15.1           | ± 4.2   | 12.7           | ± 3.7†         | 7.4   | ± 2.4‡   |
| HOMA-IR                              | 3.12           | ± 2.23  | 4.70           | ± 2.30‡        | 6.97  | ± 5.68‡  |
| Waist (cm)                           | 89             | ± 8     | 105            | ± 13‡          | 103   | ± 14‡    |
| BMI (kg/m <sup>2</sup> )             | 26.7           | ± 2.0   | 35.2           | ± 3.8‡         | 30.4  | ± 5.6‡   |
| Percent Fat                          | 33.4           | ± 9.2   | 44.1           | ± 8.2‡         | 32.8  | ± 8.0    |
| Lean Mass (kg)                       | 48.8           | ± 9.9   | 52.4           | ± 11.5         | 57.1  | ± 13.8†  |
| REE (kcal/day)                       | 1519           | ± 250   | 1639           | ± 297          | 1684  | ± 335    |
| Resting RQ                           | 0.846          | ± 0.060 | 0.857          | ± 0.060        | 0.825 | ± 0.040§ |
| FFA (mmol)                           | 0.49           | ± 0.21  | 0.55           | ± 0.19         | 0.66  | ± 0.47   |
| HDL (mg/dl)                          | 51.3           | ± 22.6  | 48.6           | ± 16.9         | 35.4  | ± 10.0‡  |
| LDL (mg/dl)                          | 118.5          | ± 38.4  | 119.8          | ± 40.5         | 119.9 | ± 36.3   |
| Fasting glucose (mg/dl)              | 90.5           | ± 8.3   | 93.8           | ± 11.3         | 213.5 | ± 77.2‡  |
| Fasting insulin (μU/ml)              | 13.6           | ± 8.2   | 20.3           | ± 9.3‡         | 15.4  | ± 15.5   |

Data are reported as mean ± standard deviation, unless stated otherwise.

\*T2DM, type 2 diabetes mellitus; EA, European American; AA, African American; IFG, impaired fasting glucose; IGT, impaired glucose tolerance; REE, resting energy expenditure; kcal, kilocalories; RQ, respiratory quotient; HDL, high-density lipoprotein; LDL, low-density lipoprotein.

†p<0.05 compared to BMI<30

‡p<0.01 compared to BMI<30

§p<0.05 compared to BMI>30

||p<0.01 compared to BMI>30

SUPPLEMENTARY DATA

**Supplementary Table 2.** Serum amino acid contents by BMI subgroup.

| Amino Acid (μM) | *ALL<br>(N=124) |         | BMI<30<br>(N=43) |         | BMI≥30<br>(N=50) |         | T2DM<br>(N=31) |          |
|-----------------|-----------------|---------|------------------|---------|------------------|---------|----------------|----------|
| Gly             | 278.9           | ± 82.8  | 286.1            | ± 85.4  | 292.7            | ± 88.0  | 246.8          | ± 61.8   |
| Leu/Ile         | 178.2           | ± 40.1  | 159.9            | ± 36.3  | 177.6            | ± 37.1§ | 204.4          | ± 36.0‡¶ |
| Ala             | 352.1           | ± 114.9 | 333.6            | ± 121.2 | 364.9            | ± 107.0 | 357.1          | ± 118.0  |
| Ser             | 107.3           | ± 24.0  | 104.4            | ± 22.5  | 109.8            | ± 27.2  | 107.3          | ± 20.4   |
| Pro             | 191.2           | ± 61.7  | 187.3            | ± 59.0  | 198.1            | ± 66.7  | 185.8          | ± 57.6   |
| Val             | 267.2           | ± 52.6  | 245.3            | ± 45.5  | 273.8            | ± 52.9† | 286.8          | ± 52.2‡  |
| Met             | 18.0            | ± 4.2   | 18.0             | ± 4.9   | 18.8             | ± 3.6   | 16.7           | ± 3.8    |
| His             | 65.1            | ± 12.8  | 66.6             | ± 13.6  | 67.5             | ± 12.5  | 59.2           | ± 10.2*¶ |
| Phe             | 74.2            | ± 13.8  | 70.9             | ± 15.3  | 76.2             | ± 12.8  | 75.6           | ± 12.4   |
| Tyr             | 77.5            | ± 24.6  | 69.3             | ± 19.9  | 84.3             | ± 24.2‡ | 77.9           | ± 28.1   |
| Asx             | 121.2           | ± 62.1  | 80.9             | ± 47.2  | 86.4             | ± 42.2  | 121.2          | ± 62.1‡  |
| Glx             | 92.0            | ± 23.1  | 86.1             | ± 24.3  | 89.9             | ± 20.5  | 103.5          | ± 22.0‡  |
| Orn             | 51.1            | ± 13.9  | 48.5             | ± 14.1  | 51.6             | ± 14.4  | 53.7           | ± 12.7   |
| Cit             | 31.9            | ± 9.0   | 32.6             | ± 10.1  | 31.3             | ± 8.1   | 31.7           | ± 8.8    |
| Arg             | 80.8            | ± 22.8  | 79.7             | ± 24.4  | 82.4             | ± 22.2  | 79.7           | ± 21.9   |

Data are reported as mean ± standard deviation, unless stated otherwise

\*ALL, all subjects included; T2DM, type 2 diabetes mellitus; Amino acid abbreviations listed in Table 2

†p<0.05 compared to BMI<30

‡p<0.01 compared to BMI<30

§p=0.057 compared to BMI<30

||p<0.05 compared to BMI≥30

¶p<0.01 compared to BMI≥30
